# Supplementary material for: Host–guest energetic materials: a promising strategy of incorporating small insensitive molecule into the lattice cavities of 2,4,6,8,10,12-hexanitrohexaazaisowurtzitane to enhance the safety on the premise of maintaining the excellent energy density
Source: Royal Society of Chemistry journal article supplement (doi:10.1039/d2ce00199c), 2022-01-01
Supplement: d2ce00199c1.pdf [file d2ce00199c1.pdf]

## Electronic Supplementary Information

### **Host-guest Energetic Materials: a Promising Strategy of Incorporating Small Insensitive Molecule into the Lattice Cavities of 2, 4, 6, 8, 10, 12-Hexanitrohexaazaisowurtzitane to Enhance the Safety on the Premise of Maintaining the Excellent Energy Density**

*Shanhu Sun,<sup>[a]</sup> Zhiqiang Wang,<sup>[a]</sup> Haobin Zhang,<sup>[a]</sup> Xiaomin Song,<sup>[a]</sup> Dengyu Jin,<sup>[a]</sup> Jinjiang Xu,<sup>\*[a]</sup> and Jie Sun<sup>\*[a]</sup>*

[a] Institute of Chemical Materials, China Academy of Engineering Physics, Mianyang, P. R. China.

**Corresponding Author:** *sunjie@caep.cn (Sun J); xujinjiang@caep.cn (Xu J).*

## Supplementary Figures and Tables

### 1 Figures

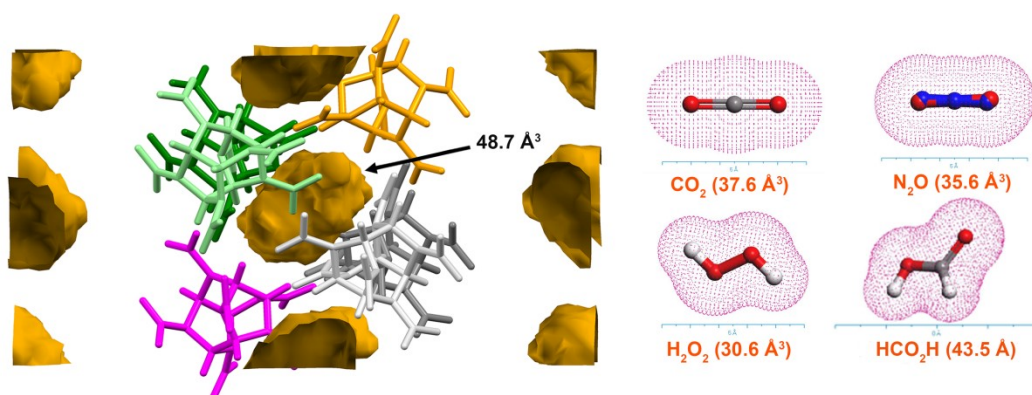

**Figure S1.** The excellent space matching between the guest molecules and the host explosives was proved by calculating the volume of lattice cavities in HNIW and the molecular volumes of guest molecules.

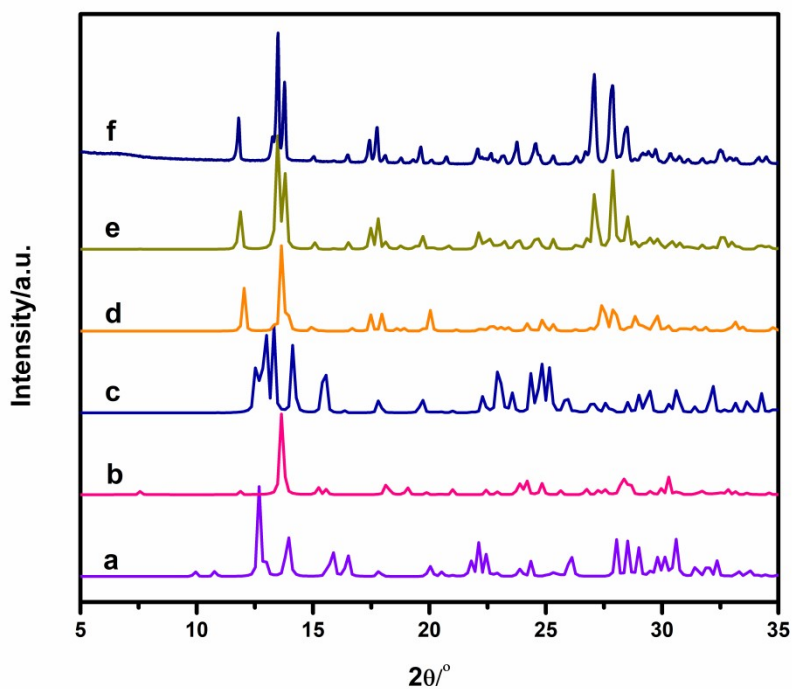

**Figure S2.** Powder X-ray diffraction patterns of HNIW-MA, α-HNIW, γ-HNIW, β-HNIW and ε-HNIW. a) simulated pattern of ε-HNIW; b) simulated pattern of β-HNIW; c) simulated pattern of γ-HNIW; d) simulated pattern of α-HNIW; e) simulated pattern of HNIW-MA; f) experimental pattern of HNIW-MA.

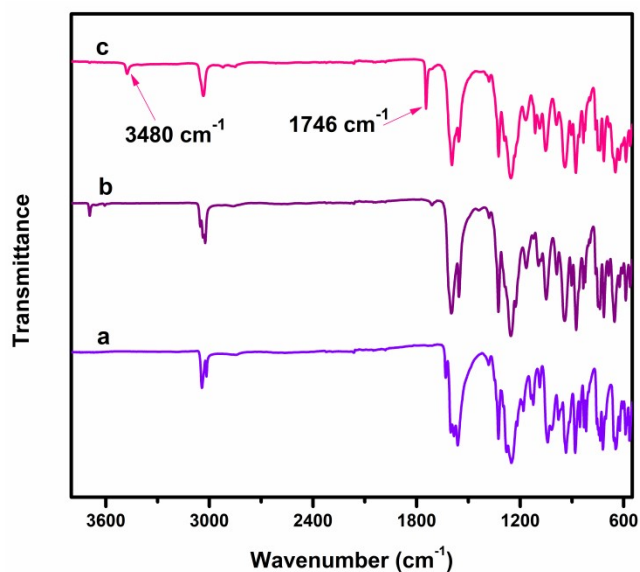

**Figure S3.** The IR spectroscopy of  $\epsilon$ -HNIW,  $\alpha$ -HNIW and HNIW-MA. a)  $\epsilon$ -HNIW; b)  $\alpha$ -HNIW; c) HNIW-MA.

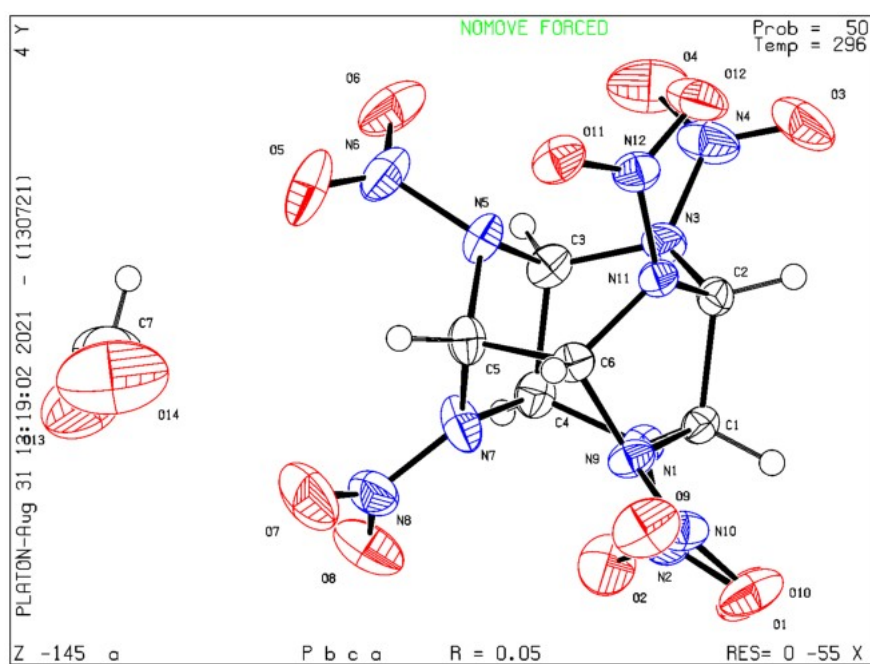

**Figure S4.** ORTEP diagram for HNIW-MA collected at 296 K with thermal ellipsoids of 50% probability.

## 2 Tables

**Table S1.** The calculated packing coefficient value of HNIW-MA.

| Materials | $V(\text{cell})/\text{\AA}^3$ | $V_m(\text{HNIW})/\text{\AA}^3$ | $V_m(\text{guest})/\text{\AA}^3$ | packing coefficient/% |
|-----------|-------------------------------|---------------------------------|----------------------------------|-----------------------|
| HNIW-MA   | 3059.9                        | 292.18                          | 43.75                            | 82.11 %               |

**Table S2.** Hydrogen bond lengths ( $\text{\AA}$ ) and bond angles ( $^\circ$ ) for HNIW-MA.

| D-H $\cdots$ A | $d(\text{H}\cdots\text{A})$ | $d(\text{D}\cdots\text{A})$ | Angle(D-H $\cdots$ A) |
|----------------|-----------------------------|-----------------------------|-----------------------|
|----------------|-----------------------------|-----------------------------|-----------------------|

|         |                  |        |        |      |
|---------|------------------|--------|--------|------|
| HNIW-HA | C(4)-H(4)⋯O(14)  | 2.35 Å | 2.89 Å | 114° |
|         | C(3)-H(3)⋯O(14)  | 2.49 Å | 2.97 Å | 110° |
|         | C(7)-H(7)⋯O(5)   | 2.45 Å | 3.13 Å | 131° |
|         | O(13)-H(13)⋯O(2) | 2.81 Å | 3.42 Å | 132° |

**Table S3.** Summary of the various interactions contributions to the Hirshfeld surface area of HNIW-MA,  $\alpha$ -HNIW and  $\varepsilon$ -HNIW.

| Interactions | Materials           |                      |         |
|--------------|---------------------|----------------------|---------|
|              | $\varepsilon$ -HNIW | HNIW-CO <sub>2</sub> | HNIW-MA |
| C...C        | 0                   | 0                    | 0       |
| C...O        | 0.1                 | 1.9                  | 0.6     |
| C...H        | 0                   | 0                    | 0.1     |
| C...N        | 0                   | 0                    | 0       |
| H...H        | 1.6                 | 1.4                  | 3.2     |
| H...O        | 36.8                | 32.4                 | 37.3    |
| H...N        | 0.8                 | 0.6                  | 1.4     |
| O...O        | 41.4                | 44.1                 | 39.4    |
| O...N        | 19.2                | 19.2                 | 17.9    |
| N...N        | 0.1                 | 0.4                  | 0.3     |

**Table S4.** The detonation parameters were predicted with EXPLO5 V5.05 and mechanical sensitivity were experimentally determined.

| Sample              | $\Delta_f H$ (kJ/mol) | Dv (km/s) | P (GPa) | H <sub>50</sub> (cm) |
|---------------------|-----------------------|-----------|---------|----------------------|
| HNIW-MA             | 159.0                 | 9466      | 41.86   | 20.8                 |
| $\varepsilon$ -HNIW | 365.4                 | 9436      | 45.32   | <14.1                |
| $\alpha$ -HNIW      | 7.2                   | 9217      | 39.81   | 14.8                 |
